# Supplementary material
Source: Springer Nature journal article supplement (https://www.springermedizin.de/resource/supplementary/12906_2012_1064_MOESM3_ESM.pdf/9520360)

**A**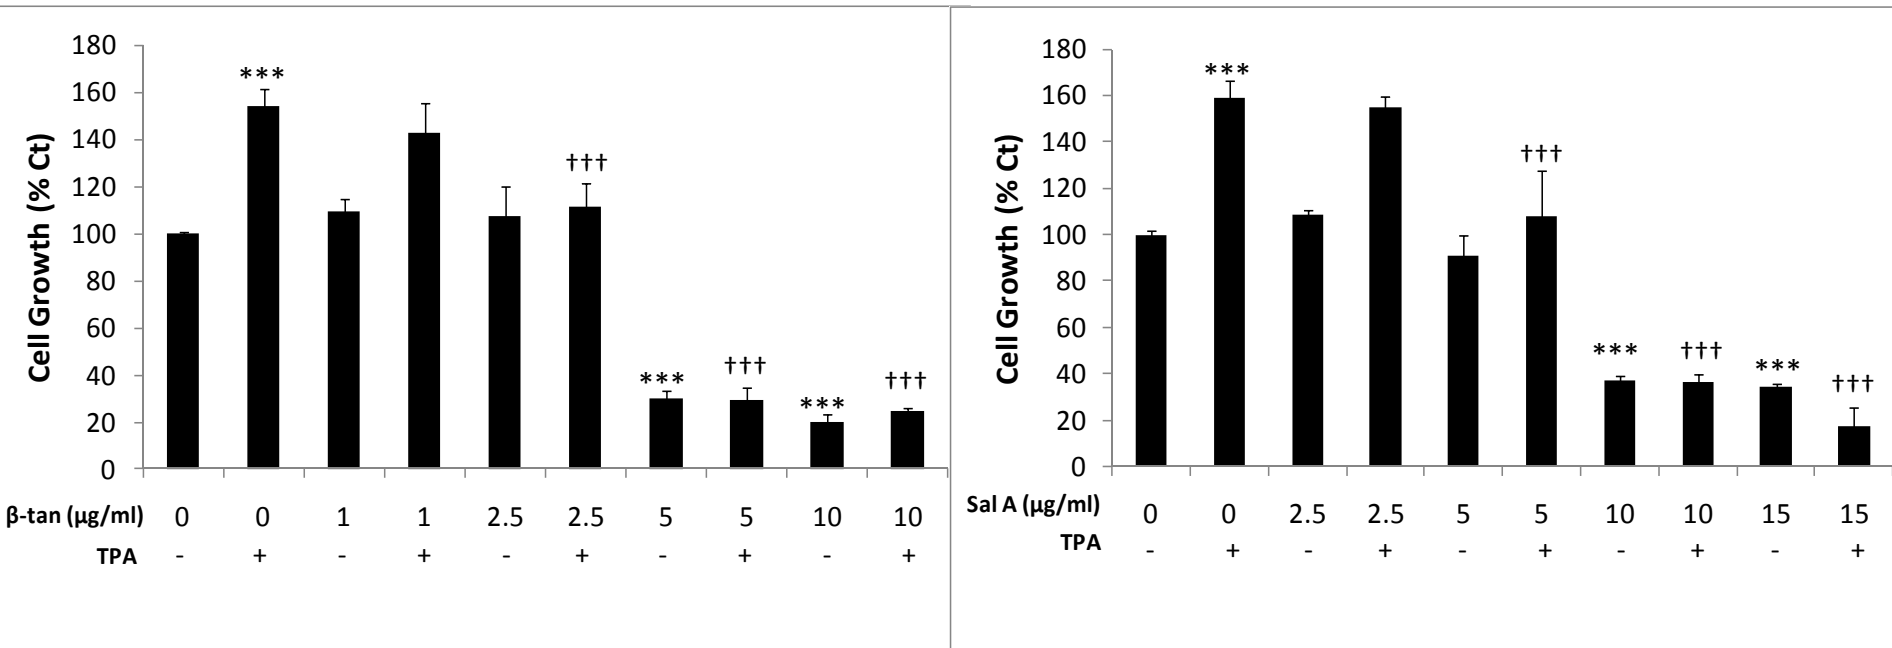**B**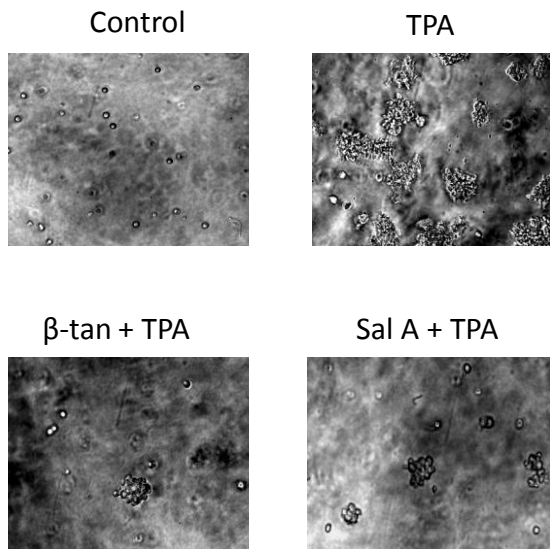**C**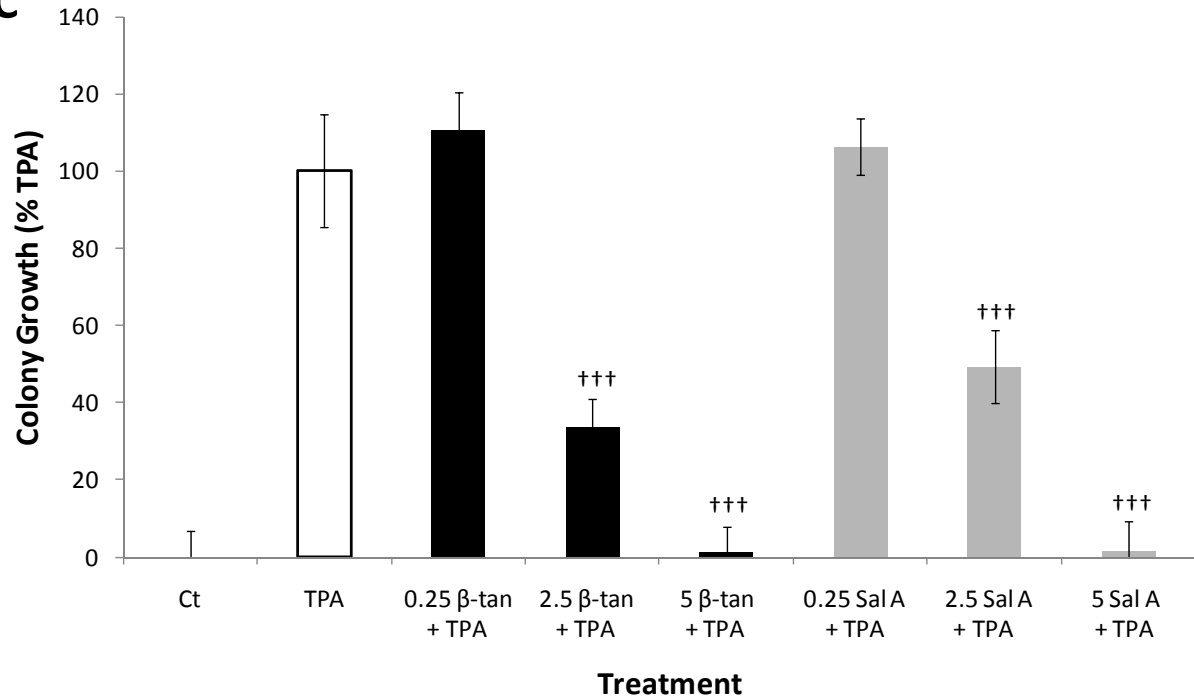

Supplement: MOESM3 [file 9520360]
